# Supplementary material
Source: Springer Nature journal article supplement (https://www.springermedizin.de/resource/supplementary/12984_2011_412_MOESM4_ESM.pdf/9605924)

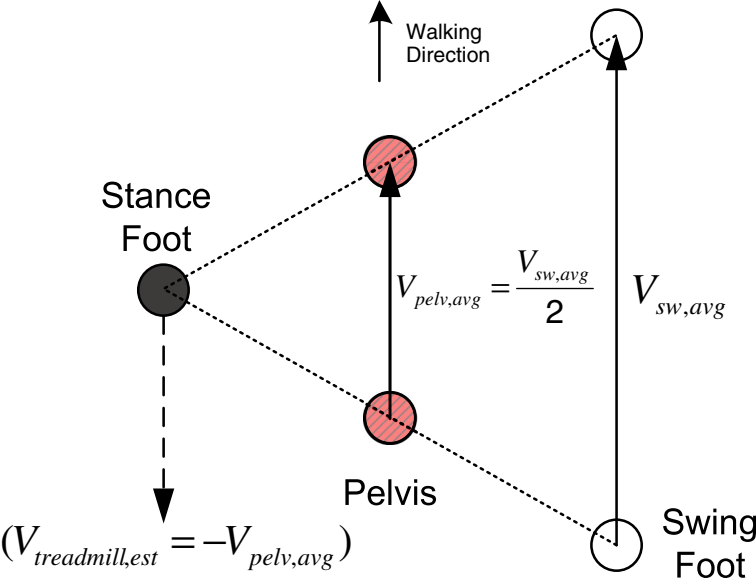

Supplement: MOESM4 [file 9605924]
